# Supplementary material for: Emergent properties in microbiome networks reveal the anthropogenic disturbance of farming practices in vineyard soil fungal communities
Source: bioRxiv or medRxiv preprint supplement (doi:10.1101/2020.03.12.983650), 2020-03-12
Supplement: Supplementary file [file media-1.pdf]

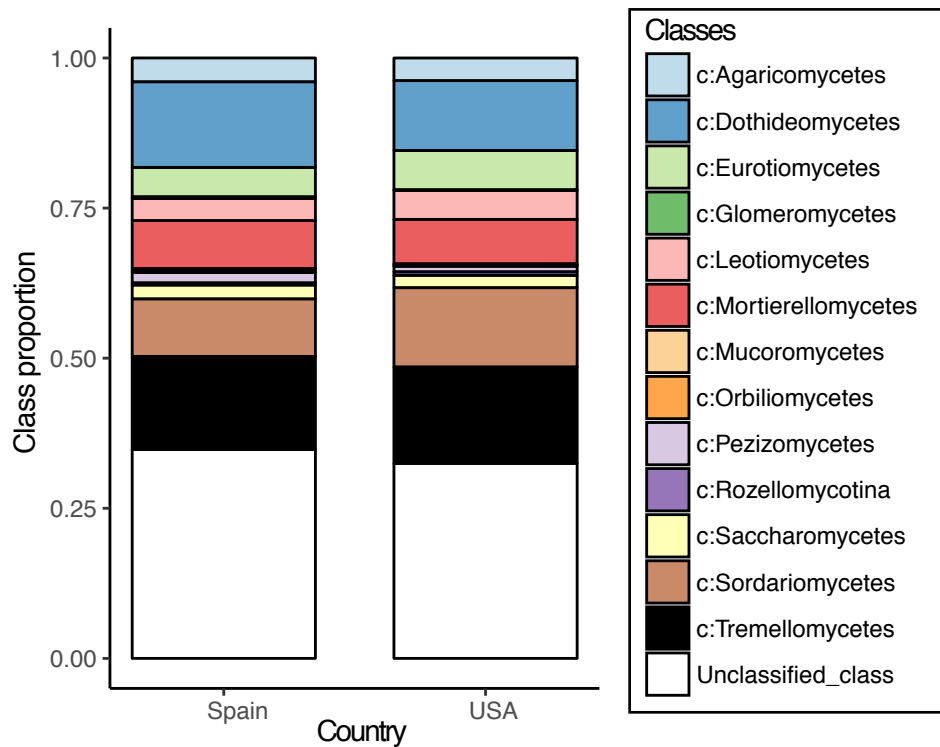

**Figure S1.** Taxonomic profile of major classes of fungi separated by country of origin (Spain and USA), as classified by Unite, and summing the relative abundances of the samples from each country.

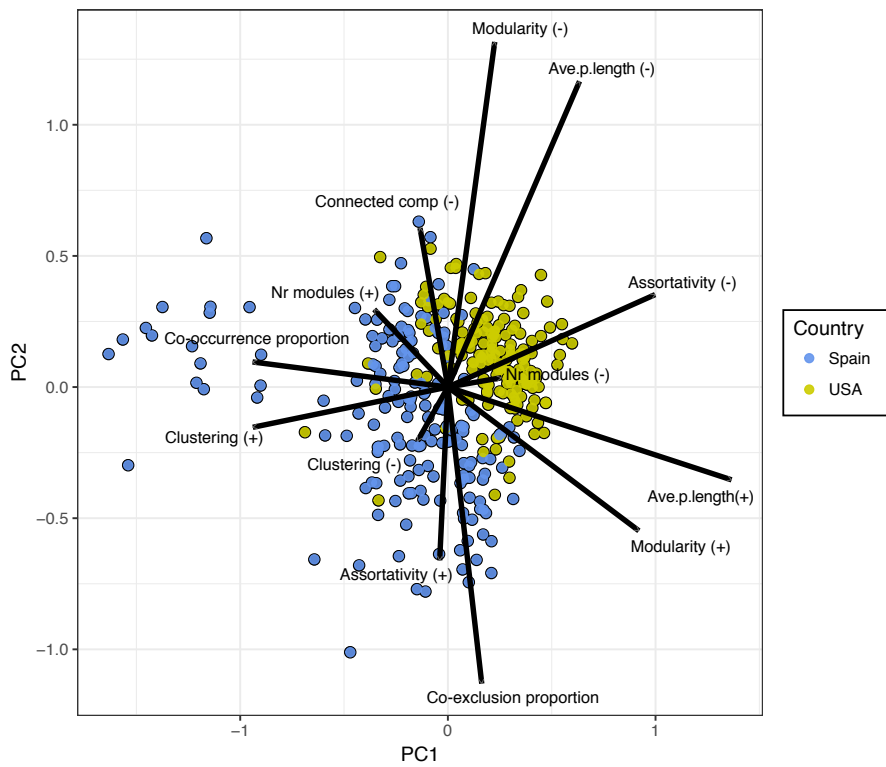

**Figure S2.** PCA of log-transformed scaled network properties separated by Country of procedence (Spain and USA).

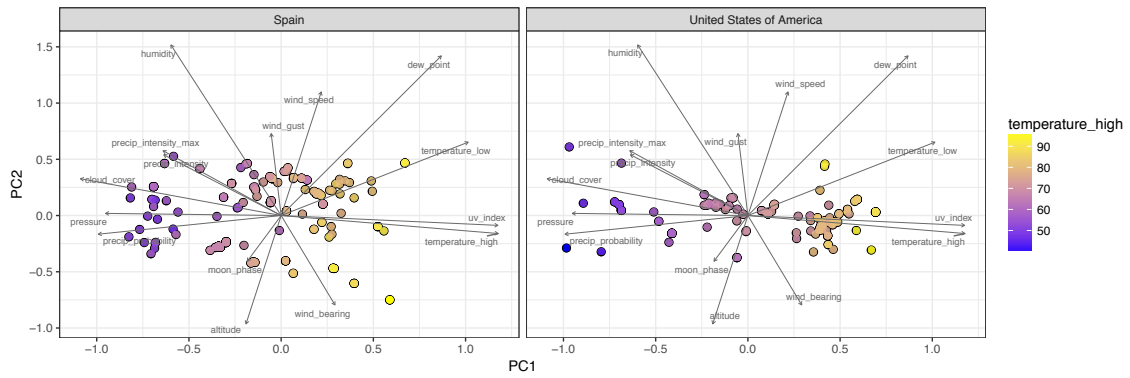

**Figure S3.** PCA of log-transformed scaled environmental variables separated by Country of procedence (Spain and USA).

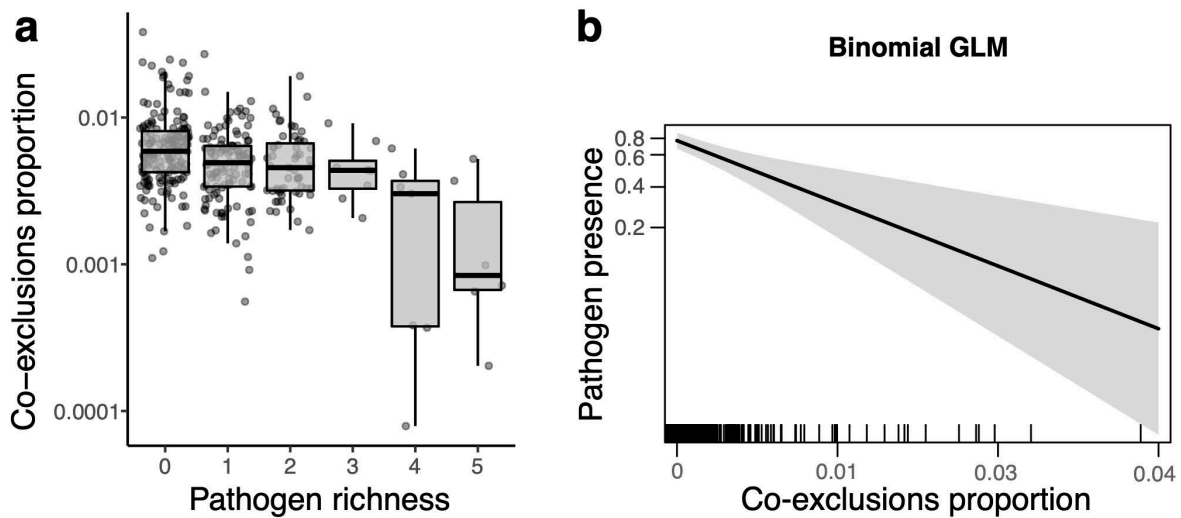

**Figure S4.** Relationship between fungal pathogen richness and co-exclusions proportion of the network. **a)** Boxplot of co-exclusions proportion at different pathogen richnesses (see Table S3 for a detailed list of the vine pathogens considered). **b)** Probability of fungal pathogen presence at different co-exclusions proportion values.

| Network property         | Spain  |         |        | USA    |         |        |
|--------------------------|--------|---------|--------|--------|---------|--------|
|                          | min    | max     | mean   | min    | max     | mean   |
| Co-occurrence proportion | 0.116  | 0.405   | 0.187  | 0.086  | 0.216   | 0.130  |
| Clustering (+)           | 0.446  | 0.934   | 0.595  | 0.344  | 0.670   | 0.463  |
| Modularity (+)           | 0.003  | 0.427   | 0.140  | 0.081  | 0.316   | 0.178  |
| Nr modules (+)           | 2.000  | 21.000  | 4.846  | 2.000  | 12.000  | 3.817  |
| Ave.p.length (+)         | 1.189  | 2.134   | 1.643  | 1.574  | 1.889   | 1.755  |
| Assortativity (+)        | 0.078  | 0.735   | 0.237  | 0.072  | 0.470   | 0.216  |
| Co-exclusion proportion  | 0.000  | 0.038   | 0.007  | 0.001  | 0.015   | 0.005  |
| Clustering (-)           | 0.000  | 0.232   | 0.019  | 0.000  | 0.027   | 0.004  |
| Connected comp (-)       | 1.000  | 6.000   | 1.914  | 1.000  | 9.000   | 1.977  |
| Modularity (-)           | 0.002  | 0.616   | 0.231  | 0.065  | 0.840   | 0.383  |
| Nr modules (-)           | 2.000  | 215.000 | 24.417 | 5.000  | 130.000 | 29.543 |
| Ave.p.length (-)         | 2.000  | 3.891   | 2.935  | 1.231  | 4.116   | 3.379  |
| Assortativity (-)        | -0.798 | -0.111  | -0.417 | -0.573 | -0.016  | -0.263 |

**Table S1.** Summary of ranges (min, max, mean) for network properties.

| <b>Variable</b>        | <b>ANOVA p</b> | <b>Net. Property</b>     |
|------------------------|----------------|--------------------------|
| <i>Country</i>         | 0.0000         | Assortativity (-)        |
|                        | 0.0000         | Ave.p.length (-)         |
|                        | 0.0000         | Ave.p.length (+)         |
|                        | 0.0001         | Co-exclusion proportion  |
|                        | 0.0000         | Co-occurrence proportion |
|                        | 0.0011         | Nr modules (+)           |
|                        | 0.0000         | Modularity (-)           |
|                        | 0.0000         | Modularity (+)           |
|                        | 0.0000         | Clustering coeff (-)     |
|                        | 0.0000         | Clustering coeff (+)     |
| <i>interaction CxM</i> | 0.0048         | Assortativity (-)        |
|                        | 0.0076         | Ave.p.length (-)         |
|                        | 0.0000         | Ave.p.length (+)         |
|                        | 0.0000         | Co-occurrence proportion |
|                        | 0.0049         | Nr modules (-)           |
|                        | 0.0044         | Nr modules (+)           |
|                        | 0.0035         | Modularity (+)           |
|                        | 0.0001         | Clustering coeff (+)     |
| <i>Management type</i> | 0.0001         | Assortativity (-)        |
|                        | 0.0001         | Assortativity (+)        |
|                        | 0.0000         | Ave.p.length (+)         |
|                        | 0.0039         | Connected components (-) |
|                        | 0.0000         | Co-exclusion proportion  |
|                        | 0.0000         | Co-occurrence proportion |
|                        | 0.0000         | Modularity (+)           |
|                        | 0.0165         | Clustering coeff (-)     |
|                        | 0.0000         | Clustering coeff (+)     |

**Table S2.** Significant results from two-way ANOVA (Country x Management type) for network properties

| Disease                | Pathogen sp.                           | presence    |
|------------------------|----------------------------------------|-------------|
| Armillaria root rot    | <i>Armillaria mellea</i>               | present     |
| Aspergillus rot        | <i>Aspergillus carbonarius</i>         | present     |
| Black foot disease     | <i>Ilyonectria robusta</i>             | present     |
| Black foot disease     | <i>Campylocarpon fasciculare</i>       | present     |
| Black foot disease     | <i>Ilyonectria liriodendri</i>         | present     |
| Black foot disease     | <i>Dactylonectria estremocensis</i>    | present     |
| Black foot disease     | <i>Campylocarpon pseudofasciculare</i> | not present |
| Botryosphaeria dieback | <i>Botryosphaeria dothidea</i>         | present     |
| Botryosphaeria dieback | <i>Lasiodiplodia missouriana</i>       | present     |
| Botryosphaeria dieback | <i>Neofusicoccum parvum</i>            | present     |
| Botryosphaeria dieback | <i>Neofusicoccum australe</i>          | not present |
| Botrytis bunch rot     | <i>Botrytis cinerea</i>                | not present |
| Esca Complex           | <i>Phaeomoniella chlamydospora</i>     | present     |
| Esca Complex           | <i>Phaeoacremonium minimum</i>         | present     |
| Esca Complex           | <i>Phaeoacremonium hispanicum</i>      | present     |
| Esca Complex           | <i>Fomitiporia aethiopica</i>          | not present |
| Esca Complex           | <i>Phaeoacremonium inflatipes</i>      | not present |
| Esca Complex           | <i>Stereum hirsutum</i>                | not present |
| Eutypa dieback         | <i>Eutypella citricola</i>             | present     |
| Eutypa dieback         | <i>Cryptovalsa ampelina</i>            | present     |
| Eutypa dieback         | <i>Diatrype stigma</i>                 | present     |
| Eutypa dieback         | <i>Eutypa lata</i>                     | not present |
| Petri disease          | <i>Cadophora luteo-olivacea</i>        | present     |
| Phomopsis dieback      | <i>Diaporthe ampelina</i>              | present     |
| Verticillium wilt      | <i>Verticillium dahliae</i>            | present     |

**Table S3.** Disease and pathogen list considered. Presence of that particular pathogen in our dataset is included.

**Table S4.** Sample and metadata list (country and management, more in BioProject PRJNA590645)
